# Supplementary material for: Pregnancy Hypertension and a Commonly Inherited IGF1R Variant (rs2016347) Reduce Breast Cancer Risk by Enhancing Mammary Gland Involution
Source: Hindawi journal article supplement (doi:10.1155/2019/6018432), 2019-08-14
Supplement: f1 [file 6018432.f1.pdf]

## Supplementary Materials

TABLE S1: Goodness of fit test results

| Alternative Hypothesis | p-value |
|------------------------|---------|
| GLM-NB > Poisson       | 0.000   |
| ZIP > Poisson          | 0.000   |
| ZINB > GLM-NB          | 0.660   |
| GLM-NB > HNB           | 0.046   |

GLM-NB = generalized linear model with negative binomial distribution

Poisson = generalized linear model with Poisson distribution

ZIP = zero-inflated poisson model

ZINB = zero-inflated negative binomial model

HNB = negative binomial hurdle model

TABLE S2: Complete adjusted negative binomial model with interaction terms

|                   | Coefficient | Standard Error | Z Value | p-value | CR (95% CI)          |
|-------------------|-------------|----------------|---------|---------|----------------------|
| HDP               | 0.208       | 0.345          | 0.604   | 0.546   | 1.231 (0.627, 2.419) |
| T Alleles = 1     | -0.027      | 0.268          | -0.102  | 0.918   | 0.973 (0.575, 1.645) |
| T Alleles = 2     | 0.099       | 0.307          | 0.322   | 0.747   | 1.104 (0.605, 2.016) |
| AFB               | 0.008       | 0.017          | 0.498   | 0.619   | 1.008 (0.975, 1.043) |
| Age               | -0.041      | 0.008          | -5.232  | 0.000   | 0.96 (0.945, 0.975)  |
| Family History    | 0.372       | 0.185          | 2.008   | 0.045   | 1.451 (1.009, 2.086) |
| BMI               | -0.022      | 0.011          | -1.918  | 0.055   | 0.979 (0.957, 1.000) |
| Parity            | 0.334       | 0.107          | 3.132   | 0.002   | 1.396 (1.133, 1.720) |
| Menarche          | -0.102      | 0.058          | -1.763  | 0.078   | 0.903 (0.806, 1.011) |
| HDP×T alleles = 1 | -0.310      | 0.417          | -0.743  | 0.457   | 0.734 (0.324, 1.661) |
| HDP×T alleles = 2 | -0.740      | 0.482          | -1.536  | 0.124   | 0.477 (0.185, 1.227) |

T alleles are treated as factor variables. HDP compares HDP+ to HDP- women. The reference for T alleles is no T alleles (T alleles = 0). The reference for family history is no family history.

TABLE S3: Complete adjusted negative binomial models stratified by HDP status

| <b>For HDP+ women only</b> |             |                |         |         |                      |
|----------------------------|-------------|----------------|---------|---------|----------------------|
|                            | Coefficient | Standard Error | Z Value | p-value | CR (95% CI)          |
| T Alleles = 1              | -0.500      | 0.326          | -1.536  | 0.124   | 0.606 (0.320, 1.148) |
| T Alleles = 2              | -0.760      | 0.386          | -1.967  | 0.049   | 0.468 (0.219, 0.997) |
| AFB                        | -0.045      | 0.028          | -1.628  | 0.104   | 0.956 (0.905, 1.009) |
| Age                        | -0.023      | 0.013          | -1.793  | 0.073   | 0.978 (0.954, 1.002) |
| Family History             | 0.071       | 0.303          | 0.235   | 0.814   | 1.074 (0.593, 1.946) |
| BMI                        | -0.027      | 0.018          | -1.522  | 0.128   | 0.973 (0.940, 1.008) |
| Parity                     | -0.048      | 0.179          | -0.267  | 0.790   | 0.953 (0.671, 1.354) |
| Menarche                   | -0.224      | 0.095          | -2.360  | 0.018   | 0.799 (0.663, 0.963) |
| <b>For HDP- women only</b> |             |                |         |         |                      |
|                            | Coefficient | Standard Error | Z Value | p-value | CR (95% CI)          |
| T Alleles = 1              | 0.013       | 0.260          | 0.052   | 0.959   | 1.014 (0.608, 1.689) |
| T Alleles = 2              | 0.080       | 0.302          | 0.264   | 0.792   | 1.083 (0.600, 1.955) |
| AFB                        | 0.022       | 0.021          | 1.022   | 0.307   | 1.022 (0.980, 1.065) |
| Age                        | -0.043      | 0.010          | -4.302  | 0.000   | 0.958 (0.940, 0.977) |
| Family History             | 0.441       | 0.229          | 1.924   | 0.054   | 1.554 (0.992, 2.435) |
| BMI                        | -0.020      | 0.014          | -1.369  | 0.171   | 0.98 (0.953, 1.009)  |
| Parity                     | 0.398       | 0.131          | 3.028   | 0.002   | 1.489 (1.151, 1.927) |
| Menarche                   | -0.041      | 0.073          | -0.556  | 0.578   | 0.96 (0.831, 1.109)  |

T alleles are treated as factor variables. The reference for T alleles is no T alleles. The reference for family history is no family history.

TABLE S4: Complete adjusted negative binomial models stratified by HDP status with alleles treated linearly for trend

| <b>For HDP+ women only</b> |             |                |         |         |                      |
|----------------------------|-------------|----------------|---------|---------|----------------------|
|                            | Coefficient | Standard Error | Z Value | p-value | CR (95% CI)          |
| T Alleles                  | -0.380      | 0.194          | -1.960  | 0.050   | 0.684 (0.468, 1.000) |
| AFB                        | -0.046      | 0.028          | -1.645  | 0.100   | 0.955 (0.904, 1.009) |
| Age                        | -0.022      | 0.013          | -1.767  | 0.077   | 0.978 (0.954, 1.002) |
| Family History             | 0.103       | 0.300          | 0.342   | 0.733   | 1.108 (0.615, 1.996) |
| BMI                        | -0.028      | 0.018          | -1.560  | 0.119   | 0.973 (0.939, 1.007) |
| Parity                     | -0.032      | 0.178          | -0.182  | 0.856   | 0.968 (0.684, 1.371) |
| Menarche                   | -0.220      | 0.093          | -2.375  | 0.018   | 0.802 (0.669, 0.962) |
| <b>For HDP- women only</b> |             |                |         |         |                      |
|                            | Coefficient | Standard Error | Z Value | p-value | CR (95% CI)          |
| T Alleles                  | 0.041       | 0.151          | 0.270   | 0.787   | 1.042 (0.775, 1.400) |
| AFB                        | 0.022       | 0.021          | 1.031   | 0.303   | 1.022 (0.981, 1.065) |
| Age                        | -0.043      | 0.010          | -4.308  | 0.000   | 0.958 (0.940, 0.977) |
| Family History             | 0.436       | 0.228          | 1.911   | 0.056   | 1.547 (0.989, 2.419) |
| BMI                        | -0.020      | 0.014          | -1.348  | 0.178   | 0.981 (0.953, 1.009) |
| Parity                     | 0.402       | 0.131          | 3.071   | 0.002   | 1.495 (1.157, 1.933) |
| Menarche                   | -0.039      | 0.072          | -0.550  | 0.582   | 0.961 (0.836, 1.106) |

T alleles are treated linearly. The reference for T alleles is no T alleles. The reference for family history is no family history.
